# Supplementary material for: Coexistence of YWHAZ amplification predicts better prognosis in muscle-invasive bladder cancer with CDKN2A or TP53 loss
Source: PubMed Central journal article supplement (PMC5085186; doi:10.18632/oncotarget.9158), 2016-05-04
Supplement: oncotarget-07-34752-s001.pdf [file oncotarget-07-34752-s001.pdf]

## **Coexistence of YWHAZ amplification predicts better prognosis in muscle-invasive bladder cancer with CDKN2A or TP53 loss**

### **Supplementary Materials**

**Supplementary Table S1: YWHAZ gene and expression status on different cell lines. See Supplementary\_Table\_S1**
